# Supplementary material
Source: Springer Nature journal article supplement (https://www.springermedizin.de/resource/supplementary/12865_2012_460_MOESM4_ESM.pdf/9428006)

**A.**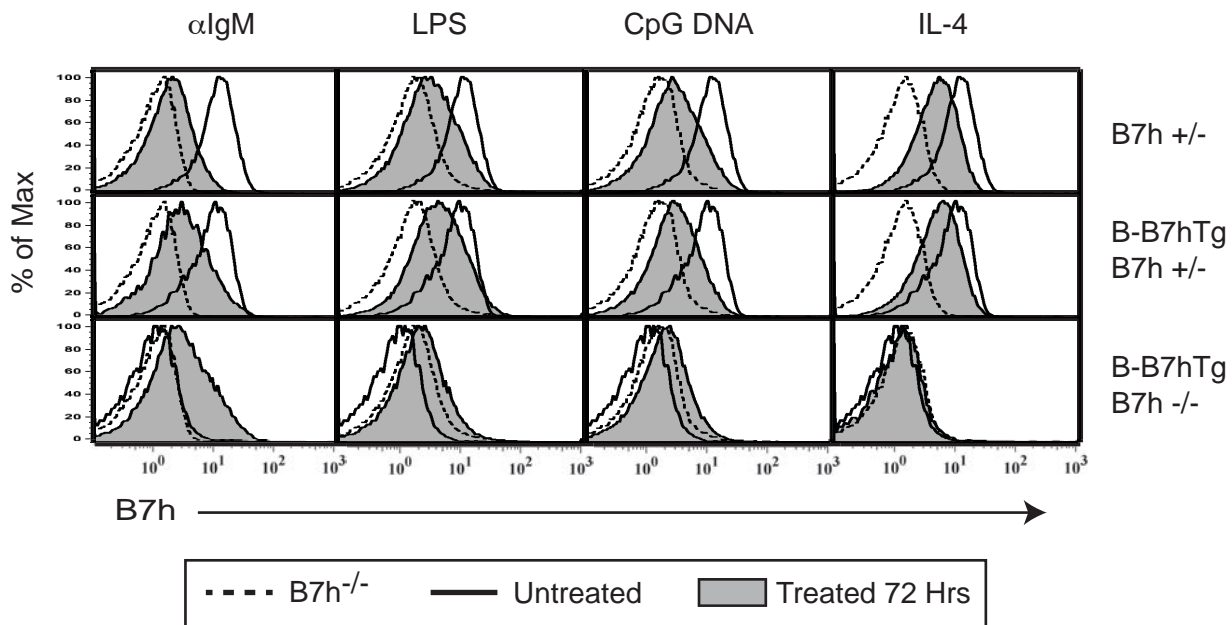**B.**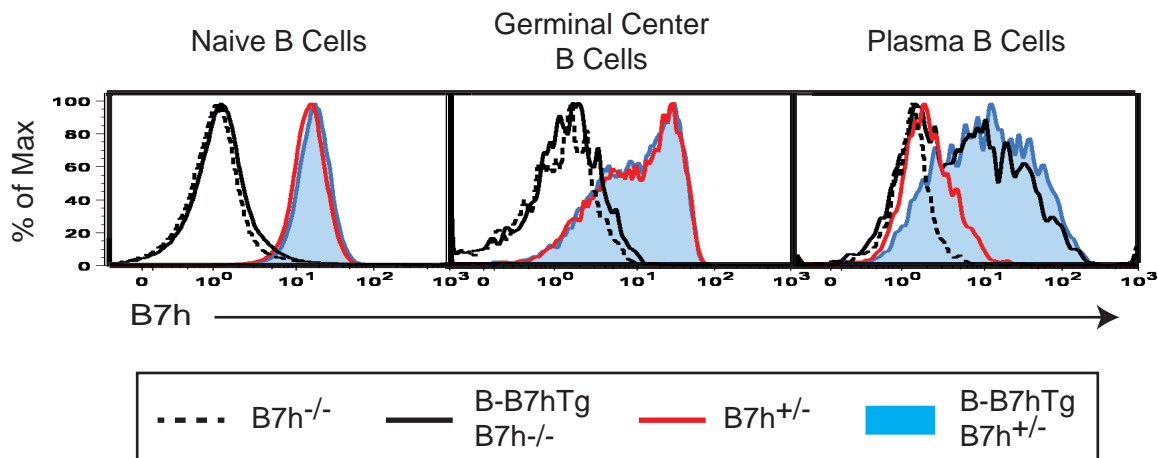

Supplement: MOESM4 [file 9428006]
